# Supplementary material for: BosR (BB0647) Controls the RpoN-RpoS Regulatory Pathway and Virulence Expression in Borrelia burgdorferi by a Novel DNA-Binding Mechanism
Source: PubMed Central journal article supplement (PMC3037356; doi:10.1371/journal.ppat.1001272), 2011-02-10
Supplement: ppat.1001272.s004.pdf [file ppat.1001272.s004.pdf]

**Table S1.** Oligonucleotide primers used in this study

| <b>Primer</b>                 | <b>Sequence (5'-3')</b>                |
|-------------------------------|----------------------------------------|
| <b>General PCR or cloning</b> |                                        |
| ZM24F, a1                     | AGCCTCATCAATGTCTCTCAGCCA               |
| ZM25.2F, c1                   | ATGGATCCGGGTTCTTATAACACAGTTAAGATCCAAG  |
| ZM25F, b4                     | CGGAATTCATGAACGACAACATAATAGACGTA       |
| ZM25R, b3                     | ATGGATCCTCATAAAGTGATTTCCCTTGTTCTCAT    |
| ZM49F, b1                     | GTCGGCATTACAAACGATCCTG                 |
| ZM49R                         | AGTGAGCTATTGTGGAAGCCAAGC               |
| bb0646F                       | TCTTGAAAATTCACACGCTCACTT               |
| bb0646R                       | TGTGTTTTGGGCGCTTTTG                    |
| 297 ospC-66F                  | AGGAAAAGATGGGAATACATC                  |
| 297 ospC-288R                 | TGTTCCATTATGCCCCGC                     |
| ZM009F                        | GTTTGTTCAGCCAGAAGCCTGAT                |
| ZM009R                        | TCTAACAGCCCACGGAACAGTTGA               |
| ZM111F                        | CCCAACGCTCGAATTTAAAGACCC               |
| ZM111R                        | TGCTCCACCAACAGAGCTAA                   |
| ZM014F                        | GGGAACTTGATTAGCCTGCGCAAT               |
| ZM014R                        | TCGAGCTTCTGATGATGCTGCT                 |
| ZM015F                        | CTTGCAGGACAAATACAAAGAGGC               |
| ZM015R                        | TGGGACTATTGTCCAGGTTATATCTTT            |
| bba24-204                     | GGGTAGTGGGTATCAGAAAATC                 |
| bba24-451                     | GAGCTGTAGTTGGAGGATTCTC                 |
| ZM88F                         | TATCCATGGTGCTAAACGGAGGCCAAGTAGAAG      |
| ZM88.2F                       | TATCCATGGCACAGTTTTTGCATGAAAAT          |
| ZM88.2R                       | GGGCCCATATGAGCAGCTCTTATTAATCCCAAGTTGCC |
| 97F                           | TATCCATGGTCTTTGCATTGGGGTTGTG           |
| 97R                           | GGGCCCATATGTATTGCGTCTAAATCATCCTT       |

ZM107F TATCCATGGCCTGAGTATTCATTATATAAGTC  
ZM108R GCGCATATGTAATTTGTGCCTCCTTTTTATTTATG  
ZM57 AGATCTATTTTATTTTATTTTTCATAAAGTGGGCTAAA  
ZM61 CATATGCTTTTCCCGTGGCTTCTTTT  
ZM69F ATGAACGACAACATAATAGACGTA  
ZM69R TCATAAAGTGATTCCTTGTTCTCAT

**For EMSA**

ZM126F TTGCATGGAAATTAAGTAGTAAAACTTAATCACAATATTCAAGAAAGGGGAGAAAATAT  
ZM126R ATATTTTCTCCCCTTTCTTGAATATTGTGATTAAGTTTTACTACTTAATTTCCATGCAA  
ZM127F TTTAGTTTAAAACCATTTTTAAATTAATTGGCACAGTTTTTGCATGAAAATTAAGTAGT  
ZM127R ACTACTTAATTTTCATGCAAAAAGTGTGCCAATTTAATTTAAAAATGGTTTTAAACTAAA  
ZM132F GGCCTTGCCGATTTAATTTACAATCAATTACAAAAAAGTAAATAATTCAAAAAATACTCC  
ZM132R GGAGTATTTTTTGAATTATTTACTTTTTTGTAAATTGATTGTAAATTAATCGGCAAGGCC  
ZM147F AAAAAGCTGAGATCTGTGACATCCATGGTGGCACAGTTTTTGCATGAAAATTAAGTAGT  
ZM147R ACTACTTAATTTTCATGCAAAAAGTGTGCCACCATGGATGTGACAGATCTCAGCTTTTTT  
ZM149F TTTAGTTTAAAACCATTTTTAAATTAATTGGCACAGTTTTTGCATTTTAAACAGGCAAAA  
ZM149R TTTTGCCTGTAAAATGCAAAAAGTGTGCCAATTTAATTTAAAAATGGTTTTAAACTAAA  
ZM157F TTTAGTTTAAAACCATTTTTAAATTAATTTTCACAGTTTTTGAATTCCAACAGGCAAAA  
ZM157R TTTTGCCTGTGGAATTCAAAAAGTGTGAAAATTTAATTTAAAAATGGTTTTAAACTAAA  
ZM160F TCACAATATTCAAGAAAGGGGAGAAAATATAATAACTATGAACATATTTAGTAATGAGGA  
ZM160R TCCTCATTACTAAATATGTTTCATAGTTATTATATTTTCTCCCCTTTCTTGAATATTGTGA  
ZM161F AACATATTTAGTAATGAGGATTTAAACATATATTTAAAATCAGTAAGAGAACACAAGCTA  
ZM161R TAGCTTGTGTTCTCTTACTGATTTTTAAATATATGTTTTAAATCCTCATTACTAAATATGTT  
ZM166F TTTAGTTTAAAACCATTTTTAGGCCAAATTTTCACAGTTTTTGAATTCCAACAGGCAAAA  
ZM166R TTTTGCCTGTGGAATTCAAAAAGTGTGAAAATTTGGCCTAAAAATGGTTTTAAACTAAA  
ZM155F CTCAAAGCTTTGGCCTTGCCGATTTAATTTACAATCAATTACAAAGCTGAGATCTGTGCA  
ZM155R TCGACAGATCTCAGCTTTGTAATTGATTGTAAATTAATCGGCAAGGCCAAAGCTTTGAG  
ZM156F GCTGAGATCTGTGCAATCAATTACAAAAAAGTAAATAATTCAAAAAATACTCCCCTAAA

ZM156R TTTAGGGGGAGTATTTTTTTGAATTATTTACTTTTTTTGTAATTGATTCGACAGATCTCAGC  
ZM210F CTCAAAGCTTTGGCCTTGCCGATTTGGCCTACAATCAATTACAAAGCTGAGATCTGTCTGA  
ZM210R TCGACAGATCTCAGCTTTGTAATTGATTGTAGGCCAAATCGGCAAGGCCAAAGCTTTGAG  
ZM211F GCTGAGATCTGTCTGAATCAATTACAAAAAGTAGGCCATTCAAAAAATACTCCCCCTAAA  
ZM211R TTTAGGGGGAGTATTTTTTTGAATGGCCTACTTTTTTTGTAATTGATTCGACAGATCTCAGC  
ZM212F ATTTTATATCCTATTTAGTTTAAAACCATTTTTTAAATTAATTTGGCACAGTTTTTGCATG  
ZM212R CATGCAAAAACTGTGCCAATTTAATTTAAAAATGGTTTTAACTAAATAGGATATAAAAAT  
ZM213F ATTTTATATCCTAGGCCGTTTAAAACCATTTTTTAAATTAATTTGGCACAGTTTTTGCATG  
ZM213R CATGCAAAAACTGTGCCAATTTAATTTAAAAATGGTTTTAAACGGCCTAGGATATAAAAAT  
ZM214F ATTTTATATCCTATTTAGTTTAAAACCATTTTTTAGGCCAAATTGGCACAGTTTTTGCATG  
ZM214R CATGCAAAAACTGTGCCAATTTGGCCTAAAAATGGTTTTAACTAAATAGGATATAAAAAT  
ZM215F TGGTTTAGATTTAATTTTTTTCTCAATTCAGCAATTTCTGAATATAGAATTTTCATATCT  
ZM215R AGATATGAAAATTCTATATTCAGAAATTGCTGAATTGAGAAAAAAATTAATCTAAACCA  
ZM216F TGGTTTAGATGGCCTTTTTTTCTCAATTCAGCAATTTCTGAATATAGAATTTTCATATCT  
ZM216R AGATATGAAAATTCTATATTCAGAAATTGCTGAATTGAGAAAAAAAGGCCATCTAAACCA  
ZM217F AGTGTA AAAAATTATAATCAATTTTTTTTCATTAAATATCCTTTTTTATTTATTATGGTATTAA  
ZM217R TTAATACCATAATAAATAAAAAGGATATTTAATGAAAAAATTGATTATAATTTTTACACT  
ZM218F AGTGTA AAAAAGGCCAATCAATTTTTTTTCATTAAATATCCTTTTTTATTTATTATGGTATTAA  
ZM218R TTAATACCATAATAAATAAAAAGGATATTTAATGAAAAAATTGATTGGCCTTTTTACACT  
ZM223F ATTTTATATCCTAGGCCGTTTAAAACCATTTTTTAGGCCAAATTGGCACAGTTTTTGCATG  
ZM223R CATGCAAAAACTGTGCCAATTTGGCCTAAAAATGGTTTTAAACGGCCTAGGATATAAAAAT  
ZM219F AAAAAAATATGAAAATAAATAAATAAATAAGTAGTAAATATTAATAACTGGGTATAAAAAT  
ZM219R ATTTTATACCCAGTTATTAATATTTTACTACTTATTATTTATTTATTTTCATATTTTTTT  
ZM220F AAAAAAATATGAAAATGGCCAAATAAATAAGTAGTAAATATTAATAACTGGGTATAAAAAT  
ZM220R ATTTTATACCCAGTTATTAATATTTTACTACTTATTATTTGGCCATTTTCATATTTTTTT

---
